# Supplementary material for: A fall in the previous 12 months predicts fracture in the subsequent 5 years in postmenopausal women
Source: Springer Nature journal article supplement (doi:10.1007/s00198-019-05255-5), 2019-12-19
Supplement: MOESM1 [file 17628734]

**A fall in the previous twelve months predicts fracture in the subsequent five years in postmenopausal women**

Nadia Afrin MD, MPH

Kuopio Musculoskeletal Research Unit (KMRU), Surgery, Institute of Clinical Medicine,

University of Eastern Finland (UEF), Kuopio, Finland

Email address: [nadia.afrin@uef.fi](mailto:nadia.afrin@uef.fi)

Reijo Sund, DSocSc

KMRU, Surgery, Institute of Clinical Medicine, UEF, Kuopio, Finland

Email address: [reijo.sund@uef.fi](mailto:reijo.sund@uef.fi)

Risto Honkanen, MD, PhD

KMRU, Surgery, Institute of Clinical Medicine, UEF, Kuopio, Finland

Department of Psychiatry, University Hospital of Oulu, Finland

Email address: [risto.honkanen@fimnet.fi](mailto:risto.honkanen@fimnet.fi)

Heli Koivumaa-Honkanen, MD, MPH, PhD

Institute of Clinical Medicine (Psychiatry), University of Eastern Finland, Kuopio, Finland

Departments of Psychiatry: Kuopio University Hospital, Kuopio; South-Savonia Hospital District, Mikkeli; North Karelia Central Hospital, Joensuu; SOTE, Iisalmi; Oulu University Hospital, Oulu, Finland

KMRU, Surgery, Institute of Clinical Medicine, UEF, Kuopio, Finland

Email address: [heli.koivumaa@kuh.fi](mailto:heli.koivumaa@kuh.fi)

Toni Rikkonen, PhD

KMRU, Surgery, Institute of Clinical Medicine, UEF, Kuopio, Finland

Email address: [toni.rikkonen@uef.fi](mailto:toni.rikkonen@uef.fi)

Lana Williams, MPsych, PhD, MAPS

IMPACT Strategic Research Centre, School of Medicine,

Deakin University, Geelong, Australia

Email address; [LANAW@barwonhealth.org.au](mailto:LANAW@barwonhealth.org.au)

Heikki Kröger, MD, PhD

KMRU, Surgery, Institute of Clinical Medicine, UEF, Kuopio, Finland, Department of Orthopedics, Traumatology and Hand Surgery, Kuopio University Hospital, Finland.

Email address: [Heikki.kroger@kuh.fi](mailto:Heikki.kroger@kuh.fi)

Correspondence to:

Nadia Afrin, University of Eastern Finland, Kuopio Musculoskeletal Research Unit

P.O. Box 1627, 70211 Kuopio, Finland, Mobile Number: +358403633949,

Fax number: +358-17-162940, Email address: [nadia.afrin@uef.fi](mailto:nadia.afrin@uef.fi)

**Table 1** **Unadjusted risks of specific type of fractures related to history of falls in comparison to non-faller risk**

|  | **Major osteoporotic fractures** | | | | **Other fractures** | | | | | |
| --- | --- | --- | --- | --- | --- | --- | --- | --- | --- | --- |
|  | Spine (an=53) | Hip (n=24) | Distal forearm  (n=313) | Proximal humerus  (n=55) | Hand, forearm and elbow  (n=87) | Chest region  (n=62) | Skull (n=13) | Pelvis (n=20) | Femur, knee and leg (n=51) | Ankle and foot  (n=212) |
| Fall type  **Any fall** | OR (95 % CI) | | | | OR (95 % CI) | | | | | |
| *-total* | 1.50 (0.81 - 2.77) | 1.10 (0.41 - 2.94) | 1.26 (0.96 - 1.64) | 1.16 (0.61 - 2.21) | 1.60(1.00 - 2.56) * | 1.99 (1.17 - 3.41) ** | 0.76 (0.17 - 3.42) | 2.25 (0.89 - 5.64) | 1.74 (0.95-3.19) | 1.26 (0.91 - 1.74) |
| *-occasional* | 1.74 (0.84 - 3.60) | 0.79 (0.18 - 3.39) | 1.35 (0.97 - 1.89) | 1.40 (0.66 - 2.98) | 1.68 (0.94 - 3.00) | 1.79 (0.90 - 3.59) | 0.68 (0.09 - 5.28) | 2.31 (0.75 - 7.10) | 1.25 (0.53 - 2.98) | 1.06 (0.68 - 1.65) |
| *-frequent* | 1.20 (0.47 - 3.06) | 1.48 (0.44 - 5.02) | 1.13 (0.77 - 1.68) | 0.87 (0.31 - 2.44) | 1.50 (0.76 - 2.93) | 2.25 (1.12 - 4.50) * | 0.85 (0.11 - 6.61) | 2.17 (0.62 - 7.63) | 2.36 (1.13 - 4.92) * | 1.51 (0.99 - 2.30) * |
| **Slip fall** |  | | | | | | | | | |
| *-total* | 1.34 (0.57 - 3.17) | 0 | 1.31 (0.92 - 1.88) | 1.42(0.64 - 3.16) | 0.97 (0.44 - 2.11) | 2.08 (1.04 - 4.16) * | 0.79 (0.10 - 6.12) | 1.34 (0.30 - 5.93) | 1.21 (0.47 - 3.09) | 1.57 (1.05 - 2.34) * |
| *-occasional* | 1.52 (0.54 - 4.28) | 0 | 1.44 (0.93 - 2.22) | 1.73 (0.68 - 4.39) | 0.7 0(0.22 - 2.25) | 2.13(0.90 - 5.04) | 0 | 1.14 (0.15 - 8.73) | 0.82 (0.20 - 3.43) | 1.19 (0.67 - 2.10) |
| *-frequent* | 1.08 (0.26 - 4.48) | 0 | 1.14 (0.64 - 2.01) | 0.98 (0.24 - 4.05) | 1.34 (0.48 - 3.69) | 2.01 (0.72 - 5.64) | 1.91 (0.25 - 14.84) | 1.62 (0.21 - 12.39) | 1.76 (0.54 - 5.73) | 2.11 (1.25 - 3.57) ** |
| **Nonslip fall** |  | | | | | | | | | |
| *-total* | 1.39 (0.54 - 3.53) | 1.14 (0.26 - 4.89) | 1.12 (0.74 - 1.71) | 1.26 (0.50 - 3.18) | 1.90 (1.00 - 3.62) * | 2.33 (1.13 - 4.81) * | 0 | 2.50 (0.71 - 8.78) | 2.41 (1.12 - 5.21) * | 0.92 (0.53 - 1.61) |
| *-occasional* | 1.42 (0.44 - 4.61) | 0.97 (0.13 - 7.26) | 1.15(0.68 - 1.96) | 1.29 (0.40 - 4.17) | 2.70 (1.32 - 5.41) ** | 1.76 (0.63 - 4.94) | 0 | 2.84 (0.64 - 12.64) | 2.06 (0.73 - 5.81) | 0.67 (0.30 - 1.53) |
| *-frequent* | 1.34 (0.32 - 5.57) | 1.37 (0.18 - 0.28) | 1.08(0.57 - 2.06) | 1.21 (0.29 - 5.03) | 0.83 (0.21 - 3.39) | 3.14 (1.23 - 8.00) * | 0 | 2.01 (0.26 - 15.38) | 2.92 (1.03 - 8.26) * | 1.29 (0.63 - 2.64) |
| **Injurious fall** |  | | | |  | | | | | |
| *-total* | 1.92 (0.68 - 5.40) | 1.96 (0.46 - 8.46) | 1.25 (0.74 - 2.09) | 1.30 (0.40 - 4.21) | 2.70 (1.33 - 5.47) ** | 2.23 (0.88 - 5.67) | 0 | 2.87 (0.65 - 12.77) | 2.61 (1.02 - 6.68) * | 1.50 (0.85 - 2.67) |
| *-occasional* | 2.44 (0.87 - 6.87) | 1.24 (0.17 - 9.31) | 1.49 (0.87 - 2.55) | 0.55 (0.08 - 3.99) | 2.27 (0.98 - 5.29) | 1.69 (0.52 - 5.49) | 0 | 1.82 (0.24 - 13.93) | 1.98 (0.61 - 6.45) | 1.46 (0.76 - 2.80) |
| *-frequent* | 0 | 4.69 (0.62 - 35.43) | 0.36 (0.05 - 2.58) | 4.18 (1.00 - 17.55) * | 4.32 (1.33 - 14.06) ** | 4.28 (1.02 - 17.99) * | 0 | 6.85 (0.89 - 53.02) | 5.00 (1.18 - 21.12) * | 1.65 (0.51 - 5.27) |
| **Non-injurious fall** |  | | | | | | | | | |
| *-total* | 1.39 (0.69 - 2.78) | 0.85 (0.25 - 2.88) | 1.26 (0.94 - 1.70) | 1.13 (0.55 - 2.32) | 1.29 (0.73 - 2.27) | 1.94 (1.07 - 3.50) * | 0.98 (0.22 - 4.43) | 2.08 (0.74 - 5.84) | 1.50 (0.74 - 3.03) | 1.20 (0.83 - 1.72) |
| *-occasional* | 1.42 (0.56 - 3.60) | 0.58 (0.08 - 4.33 | 1.29 (0.87 - 1.93) | 1.80 (0.81 - 4.02) | 1.40 (0.67 - 2.94) | 1.85 (0.83 - 4.13) | 1.00 (0.13 - 7.77) | 2.55 (0.73 - 8.97) | 0.92 (0.28 - 2.99) | 0.88 (0.50 - 1.55) |
| *-frequent* | 1.36 (0.53 - 3.45) | 1.11 (0.26 - 4.78) | 1.24 (0.83 - 1.84) | 0.49 (0.12 - 2.03) | 1.18 (0.54 - 2.58) | 2.02 (0.95 - 4.33) | 0.96 (0.13 - 7.44) | 1.63 (0.37 - 7.22) | 2.06 (0.92 - 4.66) | 1.51 (0.97 - 2.35) |

an =number of women, Any fall = slip/nonslip/unknown falls, OR=Odds Ratio, 95 % Confidence interval, * = *p* ≤ 0.05 and ** = *p* ≤ 0.01,
